1 A NEW EXPERIMENTAL MODEL OF MUSCLE PAIN IN HUMANS BASED ON SHORT-  
2 WAVE DIATHERMY

3 C. A. Mista<sup>a,b,\*</sup>, S. Laugero<sup>c</sup>, J. Adur<sup>a,c</sup>, O. K. Andersen<sup>d</sup>, J. A. Biurrun Manresa<sup>a,b,d</sup>

4  
5 <sup>a</sup> Institute for Research and Development on Bioengineering and Bioinformatics (IBB),  
6 CONICET-UNER, Oro Verde, Argentina

7 <sup>b</sup> Laboratory for Rehabilitation Engineering and Neuromuscular and Sensory Research (LIRINS),  
8 National University of Entre Ríos, Oro Verde, Argentina

9 <sup>c</sup> Department of Bioengineering, National University of Entre Ríos, Oro Verde, Argentina

10 <sup>d</sup> Center for Neuroplasticity and Pain (CNAP), SMI®, Faculty of Medicine, Aalborg University,  
11 Aalborg, Denmark

12

13

14

15

16 **\*Corresponding Author:**

17 José Biurrun Manresa, Ph.D.

18 Institute for Research and Development on Bioengineering and Bioinformatics (IBB),  
19 CONICET-UNER, Oro Verde, Argentina

20 Tel: +54 0343 4975100

21 E-mail: [jbiurrun@ingenieria.uner.edu.ar](mailto:jbiurrun@ingenieria.uner.edu.ar)

22

23 **ABSTRACT**

24 Experimental models of pain in humans are crucial for understanding pain mechanisms. The  
25 most often used muscle pain models involve the injection of algescic substances, such as  
26 hypertonic saline solution or nerve growth factor, or exercise-induced delayed onset muscle  
27 soreness (DOMS). However, these models are either invasive or take substantial time to develop,  
28 and the elicited level of pain/soreness is difficult to control. To overcome these shortcomings, we  
29 propose to elicit muscle pain by a localized application of short-wave diathermy (SWD). In this  
30 crossover study, SWD was administered to eighteen healthy volunteers to the wrist extensor  
31 muscle group, with a constant stimulation intensity and up to 4 minutes. We measured pressure  
32 pain threshold (PPT) and pinprick sensitivity (PPS) and performed a psychophysical evaluation  
33 of muscle soreness at baseline and at 0, 30 and 60 minutes. SWD evoked localized muscle  
34 pain/soreness in the wrist extensor muscle group and a decrease of PPT in the treated arm  
35 compared with the control arm that lasted for at least 60 minutes, reflecting ongoing hyperalgesia  
36 after SWD application. PPS was not significantly altered 30 to 60 min following SWD,  
37 suggesting a minimal contribution from skin tissue to sustained hyperalgesia.

38 **Trial registration**

39 The study was preregistered in ClinicalTrials.gov (identifier: NCT03573219).

40 **Perspective**

41 This is the first study to show that SWD constitutes a viable alternative as an experimental acute  
42 muscle pain model in humans.

43 **Key words (5 maximum):** Short-wave diathermy, Experimental pain model, Hyperalgesia,  
44 Musculoskeletal pain

45

46

## 47 INTRODUCTION

48 Pain-related pathologies are associated with many concurrent physiological and psychophysical  
49 processes in patients, resulting in a large number of confounding factors in the evaluation of  
50 specific mechanisms behind pain<sup>33</sup>. To address this issue, researchers have developed surrogate  
51 experimental pain models that are tested on healthy volunteers, facilitating the assessment of  
52 pain effects on the sensory-motor system in a more focused way<sup>4,12</sup>. Furthermore, testing on  
53 healthy volunteers implies that pain patients do not have to undergo additional and possibly  
54 painful testing, reducing their overall burden. In general, experimental pain models should have  
55 the following desirable features: the model should be established in a reasonably short time, the  
56 stimuli that elicit pain should be reasonably controlled and the effects of the experiments should  
57 be fully reversible, short lasting and homogeneous across volunteers. However, to the best of our  
58 knowledge, there are no experimental pain models to date that fulfill all these conditions.

59 Experimental pain models use different stimulus modalities to elicit pain, including mechanical  
60<sup>29,37,41</sup>, chemical<sup>3,42</sup>, thermal<sup>23,24</sup> or electrical stimuli<sup>8,20,27</sup>, among others. For acute muscle pain,  
61 one of the most widely used models involves the administration of intramuscular injection of  
62 algescic substances into the muscle itself or its surrounding areas. To this end, the most  
63 commonly used substances are hypertonic saline solutions and nerve growth factor (NGF)  
64<sup>1,5,20,25,43</sup>. However, both models require invasive procedures, present an uneven distribution of  
65 pain intensity and the time frames for the development of pain present distinct shortcomings in  
66 each case. For the hypertonic saline, the duration of pain is confined to a few minutes, and the  
67 short duration of pain prevents the assessment of relevant neuromodulation and pharmacological  
68 modulation of different interventions. On the other hand, NGF produces a long-lasting  
69 sensitization and pain is evoked only during a movement, but it requires 24 to 48 h to show  
70 measurable effects. Another commonly used model is delayed-onset muscle soreness (DOMS),  
71 which is a non-invasive alternative based on unaccustomed eccentric exercise routine. However,  
72 it also has a slow development (24 to 48 h), the resulting level of pain/soreness is hard to control  
73 and depends on the subject's training status<sup>32</sup>. Therefore, although these models are widely used,  
74 their limitations uphold the development of new alternatives.

75 In this regard, an unexplored possibility is to elicit muscle pain by a localized application of  
76 short-wave diathermy (SWD). High frequency oscillations of non-ionizing electromagnetic fields

77 in the radiofrequency (RF) range can heat deep tissues in a well-localized region<sup>11,39</sup>. In  
78 particular, the RF electromagnetic fields can be produced in the range of 3 kHz to 300 GHz, but  
79 frequencies around 27 MHz (short-wave) are preferred to heat deep tissues<sup>10,16</sup>. Deep tissue  
80 heating by means of RF is a safe and extensively used technique in palliative treatment of pain  
81 and as a healing agent in soft tissues<sup>16,54</sup>. However, SWD has not been previously explored with  
82 intensities suitable for inducing acute muscle pain.

83 The aim of the present study was to investigate whether SWD can elicit localized muscle  
84 pain/soreness on the wrist extensor muscle group. To this end, we performed a quantitative  
85 evaluation of the model effects through the assessment of pressure pain thresholds (PPT) and  
86 pinprick sensitivity (PPS) over extensor carpi radialis brevis (ECRB) muscles in both the  
87 dominant and the non-dominant arm (acting as control). These assessments were conducted  
88 before SWD conditioning stimulation and at 0, 30, and 60 minutes after SWD, in order to test for  
89 long lasting effects.

90

## 91 **METHODS**

### 92 *Participants*

93 Nineteen healthy volunteers (7 females, age:  $29 \pm 5$  years, weight:  $69.3 \pm 13.8$  kg, height:  $171.1$   
94  $\pm 10.4$  cm, mean  $\pm$  standard deviation) were recruited for the study. One volunteer was excluded  
95 after reporting a previous surgery in the non-dominant arm. Volunteers had no history of pain or  
96 neuromuscular disorders affecting the upper limb region. All volunteers received written and  
97 verbal description of the procedures and gave written informed consent. The study was approved  
98 by the Central Bioethics Committee for Biomedical Practice and Research, dependent from the  
99 Ministry of Health of Entre Rios (identifier: IS001890). Study preregistration, including original  
100 hypothesis, description of primary and secondary outcomes, and initial sample size  
101 consideration, was done at ClinicalTrials.gov ([identifier: NCT03573219](https://clinicaltrials.gov/ct2/show/study/NCT03573219)) and the Declaration of  
102 Helsinki was respected.

### 103 *Short-wave diathermy*

104 SWD was administered using a CEC M-8 short-wave thermotherapy unit (CEC Electrónica  
105 S.R.L., Argentina) that delivers RF at a frequency of 27.12 MHz. The device has two rectangular  
106 capacitive applicators (18 x 12 cm), that were positioned below and above the dominant forearm.  
107 Coplanar application was performed using the continuous wave mode. SWD application has two  
108 main parameters that can be controlled: application time and stimulation intensity. It is clear that  
109 at least one of these parameters must be fixed to reduce the degrees of freedom of the model.  
110 During pilot experiments, we tested both possible configurations: fixed application time with  
111 variable stimulation intensity, and fixed stimulation intensity with variable application time. The  
112 most consistent results in terms of pain/soreness elicited after stimulation were obtained using a  
113 fixed stimulation intensity at a constant value (12 out of 20 on the thermotherapy unit scale) and  
114 applying SWD for as long as subjects could tolerate the stimulation (i.e. until subjects reached  
115 tolerance threshold for thermal pain), at which moment stimulation was immediately interrupted.  
116 In this way, we found that the selected intensity was sufficiently low as to develop sustained  
117 pain/soreness within a reasonable time frame, and high enough to accumulate heat and prevent  
118 dissipation by the blood flow system.

### 119 *Response profiles during SWD application*

120 A computerized, custom-made Visual Analog Scale (VAS) was used to continuously track the  
121 response profile to thermal stimuli across subjects during the application of SWD. The scale  
122 range was from 0 to 100, where 0 represents no perception, 30 represents the pain threshold  
123 (defined here as the time to reach a painful sensation at the predefined stimulation intensity) and  
124 100 represents the tolerance threshold (defined here as the time at which the pain sensation  
125 becomes intolerable). The scale was anchored according to response profiles observed during  
126 pilot experiments, in which the early parts of the response profiles were reported as clearly non-  
127 painful thermal sensations. Additionally, McGill questionnaires and pain drawing areas were  
128 used to describe the sensation when tolerance threshold was reached.

### 129 *Pressure pain threshold assessment*

130 Pressure pain thresholds (PPT) were assessed using a digital algometer (Somedic SenseLab AB,  
131 Sweden), directly over the extensor carpi radialis brevis (ECRB), using a 1 cm<sup>2</sup> round tip.  
132 Pressure was gradually increased from 0 kPa at a rate of approximately 30 kPa/s. PPT was  
133 defined as the pressure at which the mechanical sensation becomes painful. The assessment was  
134 repeated three time for each arm, alternating sides between measurements. The median value of  
135 the three assessments was used for further analysis<sup>5,28</sup>. Changes in PPT are indicative of the  
136 development of mechanical hyperalgesia in the muscle.

### 137 *Pinprick assessment*

138 Pinprick stimuli were applied perpendicularly on the skin over the ECRB muscle using a  
139 pinprick stimulator, consisting on a needle with a 0.25 mm<sup>2</sup> tip calibrated to a weight of 50 g.  
140 The stimulus was repeated three times for each arm, randomizing the order of assessment for  
141 each trial. Volunteers scored pinprick sensation on a Numerical Rating Scale (NRS), where 0  
142 represents no perception, 30 represents the pain threshold, and 100 represents the tolerance  
143 threshold. Pinprick stimuli were assessed to differentiate deep-tissue from cutaneous  
144 hyperalgesia.

### 145 *Self-reported muscle pain/soreness*

146 A modified self-report Likert scale was used to follow the temporal progression of muscle  
147 pain/soreness at 0, 30, and 60 minutes after SWD, with 0 defining a complete absence of  
148 soreness and 6 indicating severe soreness (Table 1). This scale was selected based on previous  
149 studies reporting the effects of experimental muscle pain models<sup>1,5</sup>. Additionally, self-

150 assessment was repeated 24 h after the experiment, in order to check for potential longer lasting  
151 effects of SWD.

### 152 *Experimental protocol*

153 Volunteers participated in a single experimental session. They were instructed to sit down  
154 comfortably with the arms extended and the palm in prone position. Baseline measures (PPT,  
155 PPS, and self-reported muscle pain/soreness) were performed at the beginning of the experiment.  
156 SWD was then applied to the wrist extensor muscle group of the dominant arm, due to its  
157 incidence and prevalence of dominance in clinical muscle pain<sup>49</sup> (Fig. 1). Initially, low intensity  
158 SWD (4 out of 20 on the thermotherapy unit scale) was applied in order to localize the region to  
159 be treated without warming unwanted areas (such as wrist flexor muscles), according to verbal  
160 reports from the subjects. Afterwards, stimulation was stopped and restarted using the prefixed  
161 stimulation intensity (12 out of 20). Subjects were instructed to report the ongoing thermal  
162 sensation using the VAS scale during stimulation, until tolerance threshold for thermal pain was  
163 reached, stopping immediately after. PPT, PPS, and self-reported muscle pain/soreness were  
164 quantified immediately after SWD application, as well as 30 and 60 min later. The assessment  
165 was performed only three time points in order to avoid substantial habituation to mechanical  
166 stimulation.

### 167 *Data analysis and statistics*

168 Statistical analysis was performed using R v. 3.5.1<sup>46</sup>. A two-way repeated measures ANOVA  
169 with within-subject factors *time* (0, 30, 60 minutes after SWD) and *arm* (treated and control) was  
170 used to evaluate differences in PPT and PPS due to the application of SWD, calculated as  
171 percentage of change from baseline. Mauchly's test was carried out to verify the assumption of  
172 sphericity, and the Greenhouse-Geisser correction was applied for PPS data. A non-parametric  
173 Friedman test was employed to quantify the self-reported muscle pain/soreness after SWD with  
174 within-subject factor *time* (baseline and 0, 30, 60 minutes after SWD). Tukey's post hoc tests (in  
175 its parametric and non-parametric versions) were carried out when appropriate. Values are  
176 reported as mean  $\pm$  standard deviation or median [interquartile range] depending on whether the  
177 underlying data was normally distributed or not. *P* values smaller than 0.05 were regarded as  
178 statistically significant.

179

## 180 **RESULTS**

### 181 *Reported pain intensity and quality during SWD*

182 The induced muscle pain increased with different profiles for each subject, reaching the tolerance  
183 threshold in 1.59 [1.47] minutes (Fig. 2A). The resulting spatial extension of pain matched the  
184 treated forearm region (Fig. 2B). At the peak of the induced thermal muscle pain (i.e. at tolerance  
185 level), 22% of the participants described the pain as hot, 61% as burning, 11% as scalding, and  
186 the remaining 6% as searing.

### 187 *Self-reported muscle pain/soreness*

188 Subjects reported no muscle pain/soreness at baseline. A main effect of time was found for the  
189 self-reported muscle pain/soreness scores ( $\chi^2_3 = 19.441$ ,  $P < 0.001$ ). Post hoc tests showed that  
190 scores were significantly higher after SWD compared to baseline for all time points ( $P$  values  
191 ranging from  $< 0.001$  to 0.043), but they were not significantly different among them ( $P$  values  
192 ranging from 0.065 to 0.945). None of the subjects reported muscle pain/soreness 24 h after the  
193 experiment (Fig. 3).

### 194 *Pressure pain thresholds*

195 A main effect of *arm* was found for the PPT change scores ( $F_{1,17} = 8.897$ ,  $\eta_p^2 = 0.34$ ,  $P = 0.008$ ).  
196 The treated arm showed a significant decrease of PPT values compared to the control arm at all  
197 time points ( $P = 0.008$ ; Fig. 4), presenting an average difference of 13% between arms. No  
198 significant differences were neither found for *time* ( $F_{2,34} = 1.593$ ,  $\eta_p^2 = 0.086$ ,  $P = 0.218$ ) nor for  
199 the interaction ( $F_{2,34} = 0.042$ ,  $\eta_p^2 = 0.002$ ,  $P = 0.958$ ).

### 200 *Pinprick sensitivity*

201 Data from one subject was excluded from the pinprick sensitivity analysis as an outlier (the  
202 reported value was over three times larger than the standard deviation). No significant  
203 differences were found for *arm* ( $F_{1,17} = 1.069$ ,  $\eta_p^2 = 0.059$ ,  $P = 0.315$ ) or *time* ( $F_{1,14,19,45} = 0.400$ ,  
204  $\eta_p^2 = 0.031$ ,  $P = 0.487$ ). However, a significant interaction was found ( $F_{2,32} = 3.802$ ,  $\eta_p^2 = 0.192$ ,  
205  $P = 0.033$ ). The post-hoc analysis revealed that the treated arm showed a significant increase of  
206 the PPS compared with the control arm only immediately after SWD ( $P = 0.019$ ).

207



## 208 **DISCUSSION**

209 In this study, we applied SWD to the wrist extensor muscle group of healthy volunteers in order  
210 to induce acute muscle pain. Stimulation was fixed to a constant intensity, and SWD was applied  
211 until the tolerance threshold was reached. We then assessed changes in PPT and PPS self-  
212 reported muscle pain/soreness up to 60 minutes after SWD application. SWD evoked localized  
213 muscle pain/soreness and a decrease of PPT in the treated arm compared with the control arm  
214 that lasted for at least 60 minutes, reflecting ongoing hyperalgesia during the period of  
215 experimentation. PPS was not significantly altered between 30 to 60 min following SWD,  
216 suggesting a minimal contribution from skin tissue to sustained hyperalgesia. To our knowledge,  
217 this is the first study to show that SWD constitutes a viable alternative as an experimental acute  
218 muscle pain model in humans.

### 219 *Response profile during SWD application*

220 Volunteers reported a rapid increase in thermal pain during SWD application, reaching the heat  
221 tolerance threshold in a couple of minutes in most cases. This behavior is likely associated with  
222 responses from polymodal afferent fibers that act as heat-sensitive receptors. The transduction of  
223 the thermal stimulus is performed by a subset of channel receptors within the muscle afferents  
224 that sense and signal within specific temperature ranges. These receptors, including the  
225 temperature-activated transient receptors (TRPV), not only detect temperature in innocuous  
226 range but also in the nociceptive range<sup>30</sup>. Once the thermal stimulus is transduced, group IV and,  
227 in less proportion, group III afferent fibers are associated with the transmission of the thermal  
228 stimulus from the muscle to the central nervous system<sup>13,34</sup>. Although the temperature inside the  
229 muscle was not measured during the SWD, it is known that temperatures over 43 °C are very  
230 uncomfortable for humans<sup>9</sup>. Therefore, even though it is hypothesized that the temperature  
231 inside the muscle was above 43 °C before the stimulation was stopped, application timespans of  
232 a few minutes (max. 4 min for this experiment) are not enough to induce permanent thermal  
233 damage on the muscle tissue<sup>18,53</sup>.

### 234 *Mechanisms associated with hyperalgesia induced by SWD*

235 Subjects reported muscle soreness and a decrease in PPT values immediately after SWD  
236 application compared to the control arm, that lasted for at least 60 min after the intervention,  
237 reflecting hyperalgesia in the treated region. It should be noted that five subjects showed a slight

238 increase in PPT after SWD application. In all cases, however, the increase in PPT in the control  
239 arm was larger, probably reflecting habituation to mechanical stimulation, so the net difference  
240 between arms still showed an overall effect of SWD. Furthermore, four subjects did not report  
241 muscle soreness at any time point after SWD, although cross-referencing the data showed that all  
242 subjects but one showed a decrease in PPT.

243 The observed effect is most likely due to an inflammatory response of the neuromuscular system  
244 triggered by a fast temperature increase in the muscle, coupled with an incapability of the  
245 musculoskeletal tissue to dissipate heat at the same speed, resulting in the release of algescic  
246 substances and/or local tissue damage. However, further studies assessing inflammatory markers  
247 are required in order to confirm an ongoing inflammatory process and to gain deeper  
248 understanding of the model effects in the muscle, since most inflammatory pain models are  
249 related to skin <sup>19,31,36,48</sup>. In this regard, it is worth mentioning that although hyperalgesia has been  
250 observed when inducing thermal pain in skin tissue <sup>31</sup>, PPS after SWD only hinted at short-  
251 lasting changes after application in the present study, suggesting that the contribution of the skin  
252 to ongoing hyperalgesia after a few minutes is minimal.

253 Several mechanisms may be involved in the initiation and prolongation of the inflammation in  
254 response to SWD. Among these mechanisms, neurogenic inflammation could account for the  
255 rapid development of hyperalgesia. This inflammation process is triggered by the axon reflex,  
256 which causes a release of pro-inflammatory neuropeptides from the afferent fibers <sup>7,22</sup>. Different  
257 substances are involved in the process, including substance P and calcitonin gene-related peptide  
258 that are released both peripherally as well as in the dorsal spinal cord <sup>35</sup>. These substances  
259 mediate neurogenic inflammation symptoms by interacting with muscular and connective tissue  
260 cells <sup>6</sup>. Another pathway that may be associated with the observed hyperalgesia is the release of  
261 pro-inflammatory substances by the musculoskeletal tissue itself <sup>51</sup>. For instance, interleukin-6  
262 (IL-6) might be particularly relevant, since it has been previously demonstrated that it is highly  
263 upregulated following a significant increase of heat in the muscle <sup>51,52</sup>. This pro-inflammatory  
264 cytokine is synthesized in the initial stage of inflammation, and has also been suggested to play a  
265 role in the process of pathological pain <sup>45,55</sup>.

266 As mentioned before, mechanical hyperalgesia observed after SWD is presumably associated  
267 with the described peripheral responses at the beginning of the process. Nevertheless, central

268 mechanisms cannot be excluded as a contributing modulatory factor. There is strong evidence  
269 that acute peripheral inflammation involves specific central mechanisms, for example, through  
270 hyperexcitability of dorsal horn nociceptive neurons<sup>2,38,48</sup> and through changes in the release of  
271 inflammatory mediators or vasodilation by the sympathetic and parasympathetic system<sup>50</sup>. In  
272 rats, subcutaneous inflammation causes an increase of spinal glia activity, constituting a direct  
273 evidence of a central change induced by an acute stimulation<sup>44</sup>. In human experimental  
274 inflammation of the skin, it has been suggested that central excitability remains increased once  
275 triggered even after a single stimulation, and it does not require an ongoing nociceptive input<sup>19</sup>.  
276 However, the contribution of central mechanisms to hyperalgesia remains unclear, and further  
277 studies are needed to elucidate the processes involved in muscle inflammation after SWD.

### 278 *SWD as a muscle pain model*

279 The experimental pain model presented in this study has several key features. First, it is based on  
280 an exogenous stimulation technique that does not require invasive procedures, unlike  
281 intramuscular injection of algescic substances that are invasive and demand additional precautions  
282 when used, including correct asepsis, the use of sterile and disposable substances, and experience  
283 in the injection technique to avoid damage to nerves or other structures<sup>5,15,40</sup>. In addition, the  
284 hyperalgesia observed after the stimulation presented similar profiles compared to those reported  
285 using NGF or DOMS, but without requiring a long development time<sup>5,17</sup>. Furthermore, in  
286 contrast with muscle exercise induced pain, as DOMS, it is unlikely that SWD causes substantial  
287 damage, since this would result in release of algescic substances, including cytokinin and NGF,  
288 and would cause hyperalgesia and movement evoked pain for at least 24-48 hours after the  
289 intervention<sup>5,26,47</sup>. This does not correspond with the findings presented here, where there was an  
290 absence of discomfort or movement evoked pain when assessed after 24 h. In terms of the  
291 scientific and ecological validity of the model, it is worth stressing that even though the stimulus  
292 used to induce pain is thermal, the duration and nature of the effects observed suggest that the  
293 physiological mechanisms responsible for maintaining pain/soreness are of inflammatory origin.  
294 Finally, it should be noted that our goal is not to replace or criticize existing muscle  
295 pain/soreness models, but to develop an alternative or complementary model that is non-invasive  
296 and can be easily applied using inexpensive equipment commonly used for physical therapy, in  
297 which the stimulation parameters can be readily controlled. Furthermore, the model has a rapid

298 development time and a reasonable duration, and was successfully established in almost all  
299 volunteers tested, which suggests good reliability.

### 300 *Limitations and future work*

301 Given the fact that there is no previous investigation about SWD as a pain model, the parameters  
302 of the stimulation were set after pilot experiments, and hence further work is required to fully  
303 describe the effects of changes in the parameters (e.g. SWD intensity, application time, type of  
304 applicator) in the model outcome. As described in the pre-registered protocol, we aimed at a 20%  
305 change in PPT compared to baseline, and the observed effect was slightly smaller. Thus, we  
306 hypothesize that a larger and more consistent effect can be achieved using different parameters,  
307 for example using a higher stimulation intensity or by rekindling. In addition, it might be argued  
308 whether PPT or PPS stimulate both skin and muscle; although it has been shown that the  
309 pinprick threshold is increased whereas PPT values are not affected when the skin in  
310 anesthetized<sup>14</sup>. Furthermore, muscle tissue subjected to a sustained temperature of 42 °C over 30  
311 minutes showed not effect in the force exerted in rats, although it drastically affected the  
312 contractile properties of the muscle, reducing tetanic and peak twitch tension<sup>21</sup>. Therefore,  
313 studies assessing muscle control and function during movement or a force task may have to take  
314 the changes in contractile properties into consideration in their conclusions. Finally, further  
315 experiments are required in order to confirm the physiological mechanisms behind the model, in  
316 order to better associate it with mechanisms found in physiopathological conditions.

317

318 **CONCLUSION**

319 This new model based on SWD represents a promising tool for investigating muscle  
320 pain/soreness in humans. The main advantages of the model are its non-invasiveness, the ability  
321 to control stimulation parameters, and the convenience of the time frame in which pain and  
322 hyperalgesia are developed.

323

324 **CONFLICT OF INTEREST**

325 None declared

326

327 **ACKNOWLEDGEMENT**

328 Center for Neuroplasticity and Pain (CNAP) is supported by the Danish National Research  
329 Foundation (DNRF121).

330

331 **REFERENCES**

- 332 1. Andersen H, Arendt-Nielsen L, Svensson P, Danneskiold-Samsøe B, Graven-Nielsen T:  
333 Spatial and temporal aspects of muscle hyperalgesia induced by nerve growth factor in  
334 humans. *Exp brain Res* 191:371–82, 2008.
- 335 2. Andrew D, Greenspan JD: Mechanical and Heat Sensitization of Cutaneous Nociceptors  
336 After Peripheral Inflammation in The Rat. *J Neurophysiol* 82:2649–56, 1999.
- 337 3. Babenko V, Graven-Nielsen T, Svensson P, Drewes AM, Jensen TS, Arendt-Nielsen L:  
338 Experimental human muscle pain and muscular hyperalgesia induced by combinations of  
339 serotonin and bradykinin. *Pain* 82:1–8, 1999.
- 340 4. Le Bars D, Gozariu M, Cadden SW: Animal models of nociception. *Pharmacol Rev*  
341 53:597–652, 2001.
- 342 5. Bergin MJG, Hirata R, Mista C, Christensen SW, Tucker K, Vicenzino B, Hodges P,  
343 Graven-Nielsen T: Movement Evoked Pain and Mechanical Hyperalgesia after  
344 Intramuscular Injection of Nerve Growth Factor: A Model of Sustained Elbow Pain. *Pain*  
345 *Med* 16:2180–91, 2015.
- 346 6. Campos MM, Calixto JB: Neurokinin mediation of edema and inflammation.  
347 *Neuropeptides* 34:314–22, 2000.
- 348 7. Chiu IM, von Hehn CA, Woolf CJ: Neurogenic Inflammation – The Peripheral Nervous  
349 System’s Role in Host Defense and Immunopathology. *Nat Neurosci* 15:1063–7, 2012.
- 350 8. Curatolo M, Petersen-Felix S, Arendt-Nielsen L, Giani C, Zbinden AM, Radanov BP:  
351 Central hypersensitivity in chronic pain after whiplash injury. *Clin J Pain* 17:306–15,  
352 2001.
- 353 9. Draper DO, Castro JL, Feland B, Schulthies S, Eggett D: Shortwave Diathermy and  
354 Prolonged Stretching Increase Hamstring Flexibility More Than Prolonged Stretching  
355 Alone. *J Orthop Sport Phys Ther* 34:13–20, 2004.
- 356 10. Draper DO, Knight K, Fujiwara T, Castel JC, Caste C: Temperature Change in Human  
357 Muscle During and After Pulsed Short-Wave Diathermy. *J Orthop Sports Phys Ther*  
358 29:13–22, 1999.
- 359 11. Goats GC: Continuous short-wave (radio-frequency) diathermy. *Br J Sports Med* 23:123–  
360 7, 1989.
- 361 12. Graven-Nielsen T: Fundamentals of muscle pain, referred pain, and deep tissue

- 362 hyperalgesia. *Scand J Rheumatol Suppl* 122:1–43, 2006.
- 363 13. Graven-Nielsen T, Arendt-Nielsen L, Mense S: Thermosensitivity of muscle: High-  
364 intensity thermal stimulation of muscle tissue induces muscle pain in humans. *J Physiol*  
365 540:647–56, 2002.
- 366 14. Graven-Nielsen T, Mense S, Arendt-Nielsen L: Painful and non-painful pressure  
367 sensations from human skeletal muscle. *Exp Brain Res* 159:273–83, 2004.
- 368 15. Graven-Nielsen T, Sergerdahl M, Svensson P, Arendt-Nielsen L: Methods for induction  
369 and assessment of pain in humans with clinical and pharmacological examples. *Methods*  
370 *pain Res CRC press Boca Raton, FL*; :264–304, 2001.
- 371 16. Guo L, Kubat NJ, Nelson TR, Isenberg RA: Meta-Analysis of Clinical Efficacy of Pulsed  
372 Radio Frequency Energy Treatment. *Ann Surg* 255:457–67, 2012.
- 373 17. Hedayatpour N, Falla D, Arendt-Nielsen L, Farina D: Sensory and electromyographic  
374 mapping during delayed-onset muscle soreness. *Med Sci Sports Exerc* 40:326–34, 2008.
- 375 18. Ichinoseki-Sekine N, Naito H, Saga N, Ogura Y, Shiraishi M, Giombini A, Giovannini V,  
376 Katamoto S: Changes in muscle temperature induced by 434 MHz microwave  
377 hyperthermia. *Br J Sports Med* 41:425–9, 2007.
- 378 19. Kilo S, Schmelz M, Koltzenburg M, Handwerker HO: Different patterns of hyperalgesia  
379 induced by experimental inflammation in human skin. *Brain* 117 ( Pt 2):385–96, 1994.
- 380 20. Laursen RJ, Graven-Nielsen T, Jensen TS, Arendt-Nielsen L: Quantification of local and  
381 referred pain in humans induced by intramuscular electrical stimulation. *Eur J Pain* 1:105–  
382 13, 1997.
- 383 21. Locke M, Celotti C: The effect of heat stress on skeletal muscle contractile properties.  
384 *Cell Stress Chaperones* 19:519–27, 2014.
- 385 22. Meggs WJ: Neurogenic inflammation and sensitivity to environmental chemicals. *Environ*  
386 *Health Perspect* 101:234–8, 1993.
- 387 23. Meh D, Denišlić M: Quantitative assessment of thermal and pain sensitivity. *J Neurol Sci*  
388 127:164–9, 1994.
- 389 24. Miron D, Duncan GH, Bushnell MC: Effects of attention on the unpleasantness and  
390 intensity of thermal pain. *Pain* 39:345–352, 1989.
- 391 25. Mista CA, Christensen SW, Graven-Nielsen T: Modulation of motor variability related to  
392 experimental muscle pain during elbow-flexion contractions. *Hum Mov Sci* 39:222–35,

- 393 2015.
- 394 26. Murase S, Terazawa E, Queme F, Ota H, Matsuda T, Hirate K, Kozaki Y, Katanosaka K,  
395 Taguchi T, Urai H, Mizumura K: Bradykinin and nerve growth factor play pivotal roles in  
396 muscular mechanical hyperalgesia after exercise (delayed-onset muscle soreness). *J*  
397 *Neurosci* 30:3752–61, 2010.
- 398 27. Neziri AY, Curatolo M, Nüesch E, Scaramozzino P, Andersen OK, Arendt-Nielsen L,  
399 Jüni P: Factor analysis of responses to thermal, electrical, and mechanical painful stimuli  
400 supports the importance of multi-modal pain assessment. *Pain* 152:1146–55, 2011.
- 401 28. Neziri AY, Scaramozzino P, Andersen OK, Dickenson AH, Arendt-Nielsen L, Curatolo  
402 M: Reference values of mechanical and thermal pain tests in a pain-free population. *Eur J*  
403 *Pain* 15:376–83, 2011.
- 404 29. Nie H, Arendt-Nielsen L, Andersen H, Graven-Nielsen T: Temporal summation of pain  
405 evoked by mechanical stimulation in deep and superficial tissue. *J Pain* 6:348–55, 2005.
- 406 30. Patapoutian A, Peier AM, Story GM, Viswanath V: Thermotrpt channels and beyond:  
407 Mechanisms of temperature sensation. *Nat Rev Neurosci* 4:529–39, 2003.
- 408 31. Pedersen JL, Kehlet H: Hyperalgesia in a human model of acute inflammatory pain: a  
409 methodological study. *Pain* 74:139–51, 1998.
- 410 32. Proske U, Morgan DL: Muscle damage from eccentric exercise: mechanism, mechanical  
411 signs, adaptation and clinical applications. *J Physiol* 537:333–45, 2001.
- 412 33. Raffaelli W, Arnaudo E: Pain as a disease: an overview. *J Pain Res Dove Press*; 10:2003–  
413 8, 2017.
- 414 34. Raja SN, Meyer RA, Campbell JN: Mechanisms of Somatic Pain. *Anesthesiology* 68:571–  
415 90, 2018.
- 416 35. Richardson JD, Vasko MR: Cellular mechanisms of neurogenic inflammation.  
417 *JPharmacolExpTher* 302:839–45, 2002.
- 418 36. Sandkühler J: Models and mechanisms of hyperalgesia and allodynia. *Physiol Rev*  
419 89:707–58, 2009.
- 420 37. Sarlani E, Greenspan JD: Gender differences in temporal summation of mechanically  
421 evoked pain. *Pain* 97:163–9, 2002.
- 422 38. Schaible H-G: Peripheral and central mechanisms of pain generation. *Analgesia* :3–28,  
423 2007.



- 424 39. Shields N, Gormley J, O'Hare N: Short-wave diathermy: current clinical and safety  
425 practices. *Physiother Res Int* 7:191–202, 2002.
- 426 40. Sjøogaard G, Lundberg U, Kadefors R: The role of muscle activity and mental load in the  
427 development of pain and degenerative processes at the muscle cell level during computer  
428 work. *Eur J Appl Physiol* 83:99–105, 2000.
- 429 41. Staud R, Cannon RC, Mauderli AP, Robinson ME, Price DD, Vierck CJ: Temporal  
430 summation of pain from mechanical stimulation of muscle tissue in normal controls and  
431 subjects with fibromyalgia syndrome. *Pain* 102:87–95, 2003.
- 432 42. Svensson P, Cairns BE, Wang K, Hu JW, Graven-Nielsen T, Arendt-Nielsen L, Sessle BJ:  
433 Glutamate-evoked pain and mechanical allodynia in the human masseter muscle. *Pain*  
434 101:221–7, 2003.
- 435 43. Svensson P, Wang K, Arendt-Nielsen L, Cairns BE: Effects of NGF-induced muscle  
436 sensitization on proprioception and nociception. *Exp brain Res* 189:1–10, 2008.
- 437 44. Sweitzer SM, Colburn RW, Rutkowski M, DeLeo JA: Acute peripheral inflammation  
438 induces moderate glial activation and spinal IL-1 $\beta$  expression that correlates with pain  
439 behavior in the rat. *Brain Res* 829:209–21, 1999.
- 440 45. Tanaka T, Narazaki M, Kishimoto T: IL-6 in Inflammation, Immunity, and Disease. *Cold*  
441 *Spring Harb Perspect Biol* 6:a016295, 2014.
- 442 46. Team RC: R: A Language and Environment for Statistical Computing. Vienna, Austria;  
443 2018.
- 444 47. Tegeder L, Zimmermann J, Meller ST, Geisslinger G: Release of algescic substances in  
445 human experimental muscle pain. *Inflamm Res* 51:393–402, 2002.
- 446 48. Treede RD, Meyer RA, Raja SN, Campbell JN: Peripheral and central mechanisms of  
447 cutaneous hyperalgesia. *Prog Neurobiol* 38:397–421, 1992.
- 448 49. Vicenzino B, Wright A: Lateral epicondylalgia I: epidemiology, pathophysiology,  
449 aetiology and natural history. *Phys Ther Rev* 1:23–34, 1996.
- 450 50. Waldburger JM, Firestein GS: Regulation of peripheral inflammation by the central  
451 nervous system. *Curr Rheumatol Rep* 12:370–8, 2010.
- 452 51. Welc SS, Clanton TL, Dineen SM, Leon LR: Heat stroke activates a stress-induced  
453 cytokine response in skeletal muscle. *J Appl Physiol* 115:1126–37, 2013.
- 454 52. Welc SS, Judge AR, Clanton TL: Skeletal muscle interleukin-6 regulation in

- 455 hyperthermia. *AJP Cell Physiol* 305:406–13, 2013.
- 456 53. Yarmolenko PS, Moon EJ, Landon C, Manzoor A, Hochman DW, Viglianti BL, Dewhirst  
457 MW: Thresholds for thermal damage to normal tissues: An update. *Int J Hyperth* 27:320–  
458 43, 2011.
- 459 54. Yu C, Peng R-Y: Biological effects and mechanisms of shortwave radiation: a review. *Mil*  
460 *Med Res Military Medical Research*; 4:24, 2017.
- 461 55. Zhang J-M, An J: Cytokines, Inflammation and Pain. *Int Anesthesiol Clin* 45:27–37,  
462 2007.
- 463
- 464

465 **FIGURE LEGENDS**

466 **Fig. 1.** A) Short wave diathermy (SWD) was applied to the forearm until tolerance threshold was  
467 reached, while volunteers reported the response profile of thermal stimuli using an Analog  
468 Visual Scale (VAS). B) Experimental procedure. Pressure pain threshold (PPT) and pinprick  
469 (PPS) were first measured at baseline. Afterwards, SWD was administered to the dominant  
470 forearm. A self-reported muscle pain/soreness assessment of the model effects was carried out,  
471 then PPT and PPS assessment was repeated after 0, 30, and 60 min.

472  
473 **Fig. 2.** A) Time course of the reported thermal induced muscle pain during SWD (0 represents  
474 the beginning of the stimulation), it can be noted that tolerance thermal threshold was reached  
475 with different speed across subjects. B) pain chart drawings of the painful area at the tolerance  
476 threshold in the treated arm.

477  
478 **Fig. 3.** Self-reported muscle soreness scores of the treated arm at baseline, 0, 30, 60 min, and 24  
479 hs.

480  
481 **Fig. 4.** Individual (light line) and average (heavy line) PPT from treated and control arm at 0, 30,  
482 60 minutes after intervention. Values are presented as percentage of change from baseline -i.e.  
483 before SWD. \*\* Treated arm showed a significant decrease in PPT compared with control arm  
484 for all time points ( $P = 0.008$ ).

485  
486 **Fig. 5.** Individual (light line) and average (heavy line) PPS scores from treated and control arm at  
487 0, 30, 60 minutes after application of SWD. Values are presented as percentage of change from  
488 baseline -i.e. before SWD. \* Treated arm showed a significant increase of the PPS compared  
489 with the control arm only immediately after SWD ( $P = 0.019$ ).

490



492 **TABLES**

493 **Table 1.** Modified Likert scale of muscle pain/soreness.

| Score | Description                                                                                     |
|-------|-------------------------------------------------------------------------------------------------|
| 0     | a complete absence of soreness                                                                  |
| 1     | a light soreness in the muscle felt only when touched/a vague ache                              |
| 2     | a moderate soreness felt only when touched/a slight persistent ache                             |
| 3     | a light muscle soreness when lifting objects or carrying objects                                |
| 4     | a light muscle soreness, stiffness or weakness when moving the wrist without gripping an object |
| 5     | a moderate muscle soreness, stiffness or weakness when moving the wrist                         |
| 6     | a severe muscle soreness, stiffness or weakness that limits my ability to move                  |

494

495

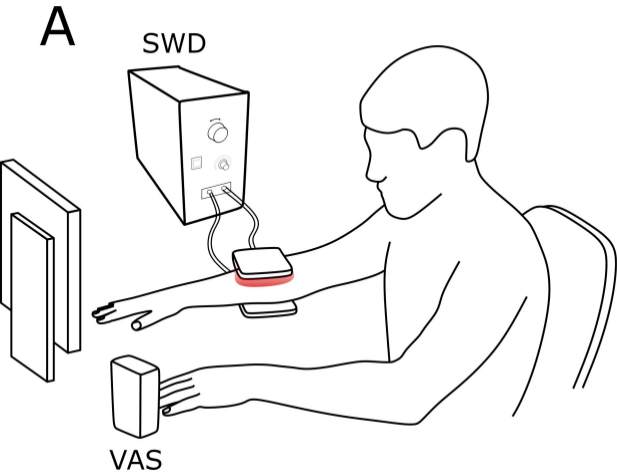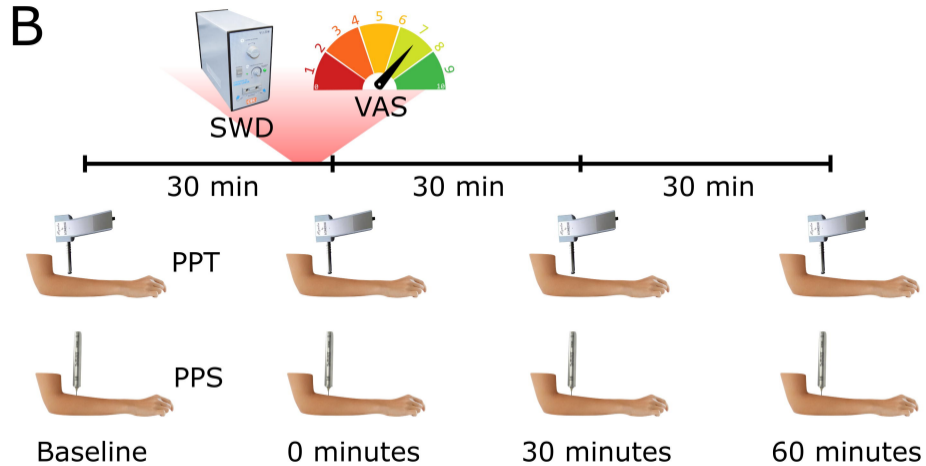

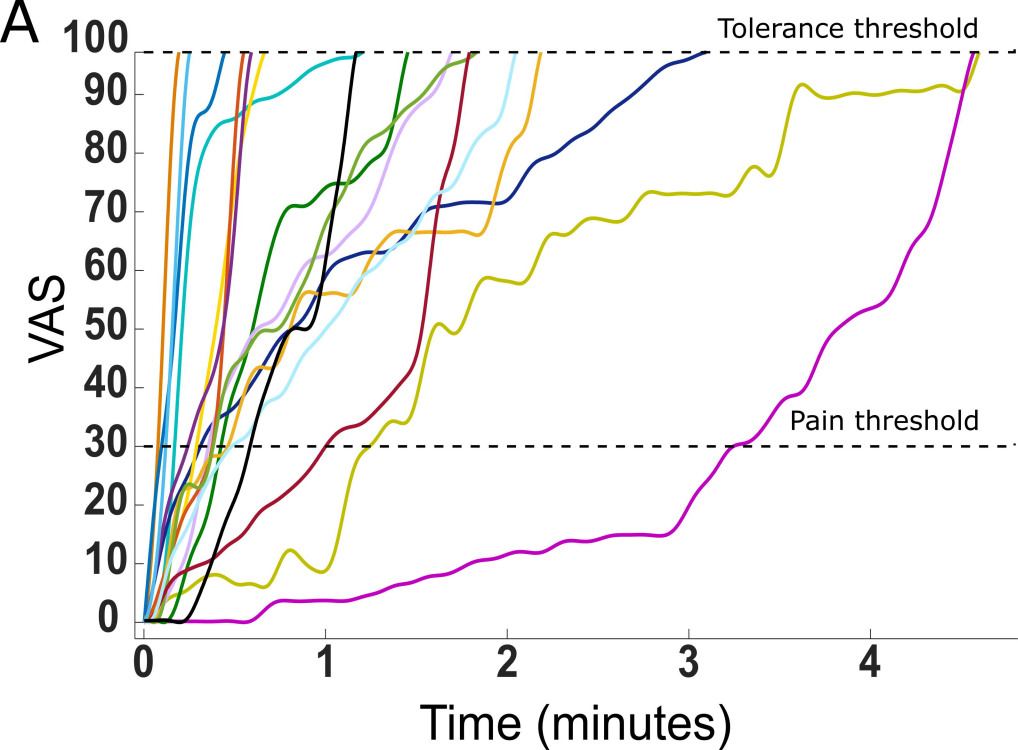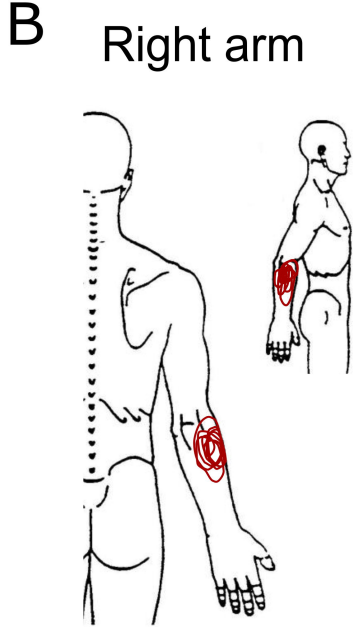

Subject (ID number)

15

10

5

0

Baseline

0 min

30 min

60 min

24 h

Time

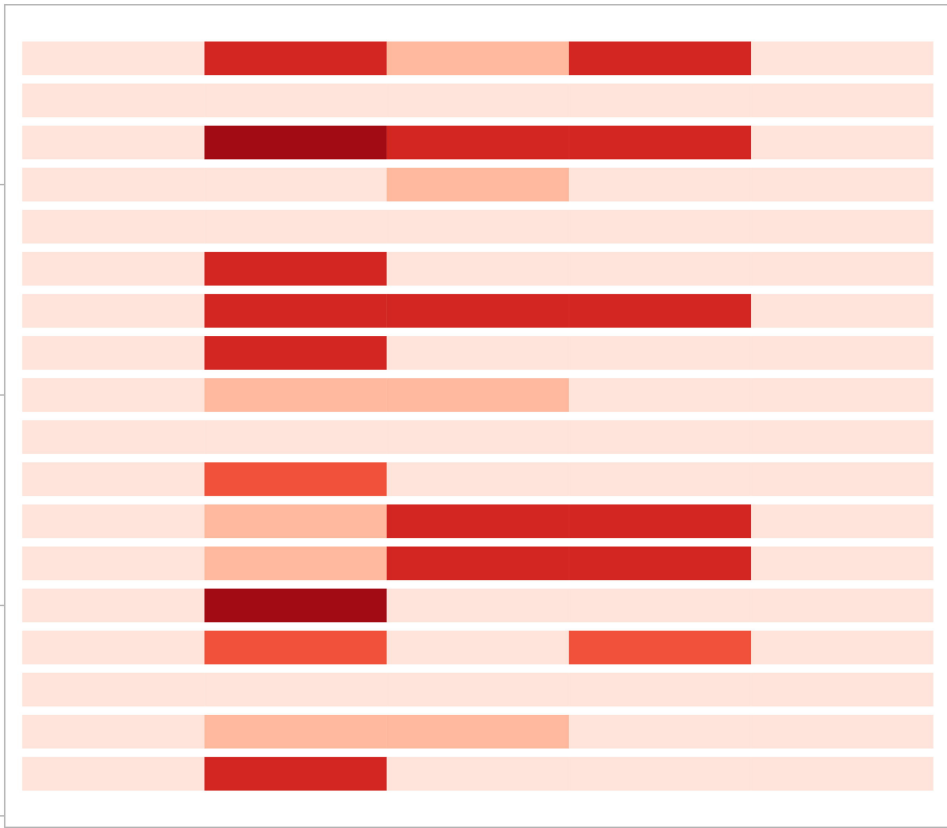



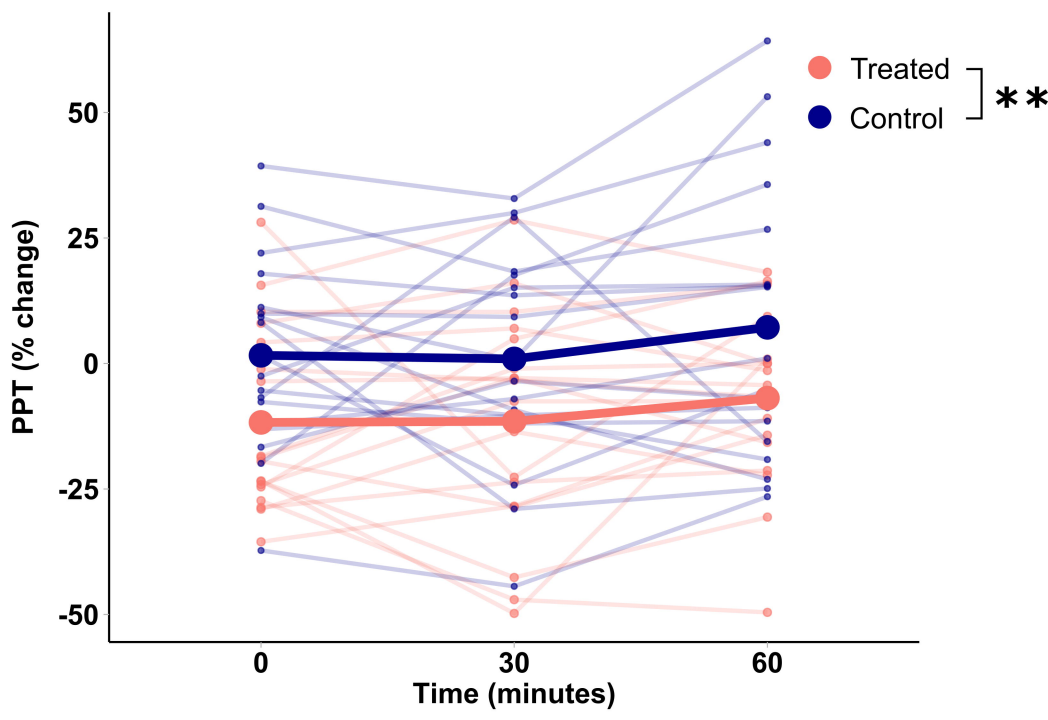

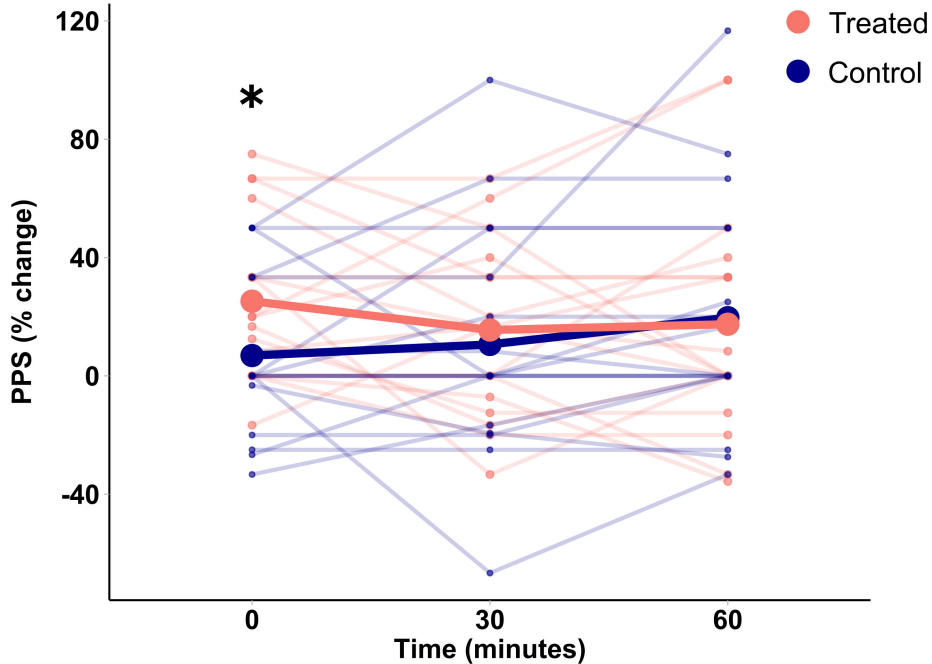

Source: https://www.biorxiv.org/content/10.1101/537878v1.full.pdf
